# Supplementary material
Source: PubMed Central journal article supplement (PMC3359489)

Supplementary  
Figure 1

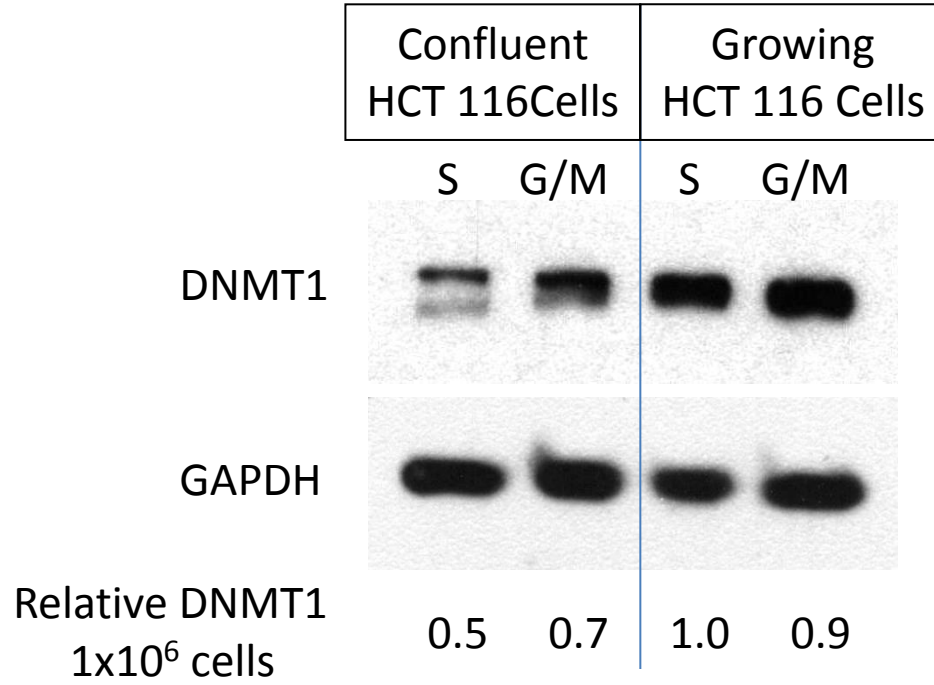

Supplement: epi0608_1021SD1.pdf [file epi0608_1021SD1.pdf]
